# Supplementary material for: Effects of blood flow restriction combined with electrical muscle stimulation on muscle functions and sports performance in male football players with knee osteoarthritis: a randomized controlled trial
Source: Research Square preprint supplement (doi:10.21203/rs.3.rs-4830944/v1), 2024-10-07
Supplement: Supplementary file 1 [file b28c5c596a17825d184aee55.docx]

Table 1. The timetable for participant recruitment, intervention, and assessment

| Timepoint | | Before  (week 0) | Baseline  (week 0) | Intervention  (week 1-week 8) | End of intervention  (week 8) |
| --- | --- | --- | --- | --- | --- |
| Enrollment | |  |  |  |  |
|  | Recruitment and screening | 🗙 |  |  |  |
|  | Allocation |  | 🗙 | × |  |
|  | CTR |  |  | 🗙 |  |
|  | BFRT |  |  | 🗙 |  |
|  | EMS |  |  | 🗙 |  |
|  | CMB |  |  | 🗙 |  |
| Primary outcomes | |  |  |  |  |
|  | 10-m sprints |  | 🗙 |  | 🗙 |
|  | 20-m sprints |  | 🗙 |  | 🗙 |
|  | CMJ height |  | 🗙 |  | 🗙 |
|  | IAT |  | 🗙 |  | 🗙 |
| Secondary outcomes | |  |  |  |  |
|  | PT |  | 🗙 |  | 🗙 |
|  | RMS |  | 🗙 |  | 🗙 |
|  | CSA |  | 🗙 |  | 🗙 |
| Other | |  |  |  |  |
|  | Participants’ compliance |  |  | 🗙 | 🗙 |
|  | Adverse events |  |  | 🗙 | 🗙 |
|  | Dropout reasons |  |  | 🗙 | 🗙 |

Notes: CTR: control group, BFRT: BFR-alone group, EMS: EMS-alone group, CMB: BFR combined with EMS group, CMJ: countermovement jump, IAT: Illinois agility test, PT: peak torque, RMS: root mean square, CSA: cross-sectional area


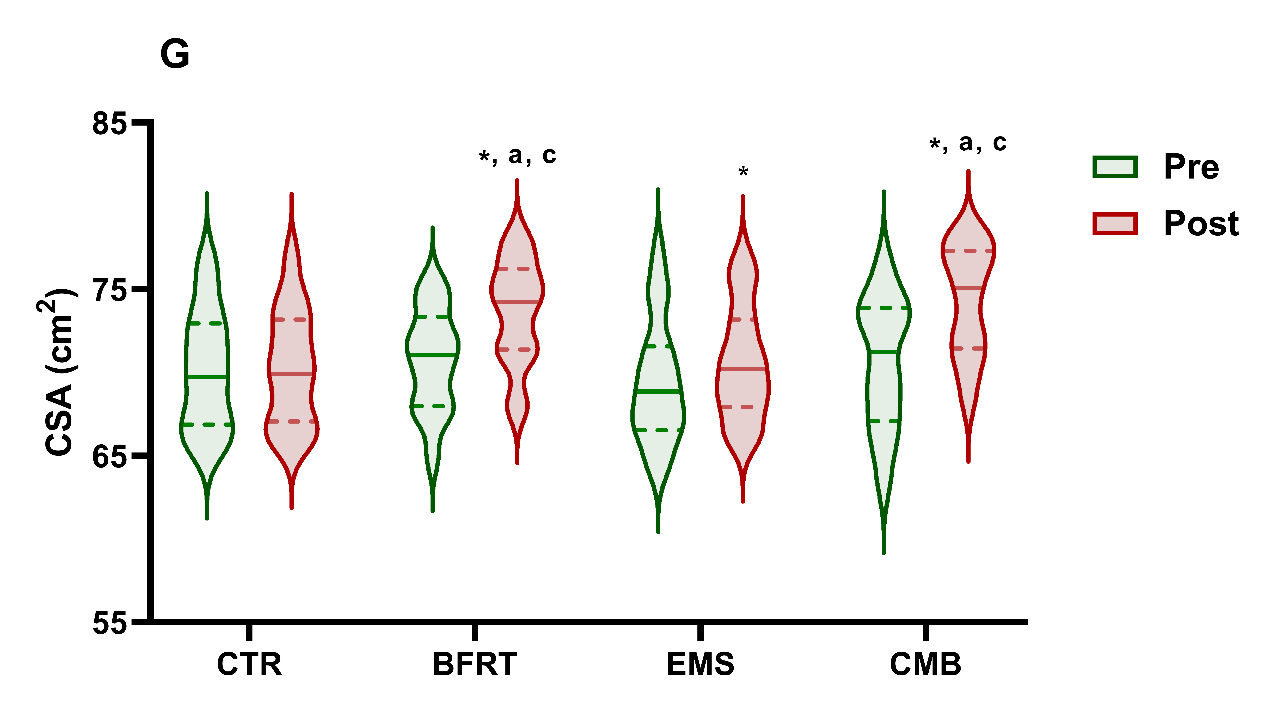


**Figure 5.** Between-group comparisons of muscle volume at baseline and after the 8th week of interventions

Notes: CTR: Control group, BFRT: BFR-alone group, EMS: EMS-alone group, CMB: BFR combined with EMS group, CSA: Cross-sectional area of RF on the dominant side. (a): Comparison with CTR group, *p* < 0.05, (b): Comparison with BFRT group, *p* < 0.05, (c): Comparison with EMS group, *p* < 0.05, (d): Comparison with CMB group, *p* < 0.05.
